# Supplementary material
Source: publisher site journal article supplement (https://www.dovepress.com/get_supplementary_file.php?f=496720.docx)
Supplement: Supplementary file 1 [file get_supplementary_file.php]

Table S1. Information of SNPs instrumental variants associated Alopecia Areata.

| SNP | chr | pos | beta | se | *P*-val | effect_allele | other_allele | eaf |
| --- | --- | --- | --- | --- | --- | --- | --- | --- |
| rs12747089 | 1 | 219438022 | 0.5839 | 0.1223 | 1.81E-06 | C | T | 0.1434 |
| rs140311238 | 2 | 100347622 | 2.1019 | 0.4515 | 3.24E-06 | A | G | 0.01236 |
| rs11888428 | 2 | 101319672 | 2.6852 | 0.5806 | 3.75E-06 | T | G | 0.008028 |
| rs77242027 | 3 | 112703269 | 3.2694 | 0.6505 | 5.00E-07 | G | A | 0.00678 |
| rs9275577 | 6 | 32679345 | 0.494 | 0.0977 | 4.26E-07 | T | A | 0.5074 |
| rs884289 | 10 | 2714749 | 0.612 | 0.1298 | 2.43E-06 | G | A | 0.1273 |
| rs10509200 | 10 | 65626561 | 0.4788 | 0.1013 | 2.29E-06 | C | T | 0.2223 |
| rs612409 | 11 | 121522709 | -0.3859 | 0.0833 | 3.57E-06 | G | A | 0.4872 |
| rs77819332 | 12 | 93715609 | 3.3421 | 0.7224 | 3.73E-06 | T | C | 0.005723 |
| rs2417873 | 12 | 21166323 | 0.504 | 0.1085 | 3.41E-06 | A | G | 0.1883 |
| rs144149638 | 18 | 33457031 | 1.8738 | 0.4085 | 4.51E-06 | T | C | 0.01452 |
| rs150607601 | 20 | 9602753 | 1.5125 | 0.3263 | 3.57E-06 | T | C | 0.02121 |

Table S2. Information of SNPs instrumental variants associated Hepatic bile duct cancer using for reverse MR.

| SNP | chr | pos | beta | se | *P*-val | effect_allele | other_allele | eaf |
| --- | --- | --- | --- | --- | --- | --- | --- | --- |
| rs12137364 | 1 | 55333865 | 0.4681 | 0.0865 | 6.37E-08 | T | C | 0.0684879 |
| rs112305235 | 2 | 105022487 | -0.3278 | 0.0707 | 3.57E-06 | C | G | 0.488313 |
| rs188491119 | 4 | 168786377 | 1.6265 | 0.3466 | 2.69E-06 | C | T | 0.00666762 |
| rs59898202 | 4 | 167853866 | 0.3472 | 0.0719 | 1.36E-06 | A | C | 0.103419 |
| rs562361422 | 8 | 18455334 | 0.2403 | 0.0511 | 2.56E-06 | G | A | 0.691411 |
| rs117805961 | 10 | 94563745 | 0.707 | 0.1497 | 2.33E-06 | T | C | 0.0315925 |
| rs11194125 | 10 | 110263742 | 0.4823 | 0.1048 | 4.14E-06 | C | T | 0.0652506 |
| rs7077568 | 10 | 17498867 | -0.2375 | 0.0515 | 4.04E-06 | C | T | 0.182664 |
| rs144029375 | 14 | 20262454 | 1.703 | 0.3443 | 7.57E-07 | C | A | 0.05149 |
| rs145542228 | 15 | 50195862 | 1.278 | 0.2769 | 3.91E-06 | A | G | 0.00981609 |
| rs150057262 | 19 | 19320825 | 1.1045 | 0.2018 | 4.39E-08 | G | C | 0.0230154 |

Table S3. Information of SNPs instrumental variants associated Colorectal cancer using for reverse MR.

| SNP | chr | pos | beta | se | P-val | effect_allele | other_allele | eaf |
| --- | --- | --- | --- | --- | --- | --- | --- | --- |
| rs164154 | 1 | 162342203 | -0.058 | 0.0127 | 4.80E-06 | G | A | 0.606018 |
| rs28605759 | 1 | 38399816 | -0.0603 | 0.0122 | 8.15E-07 | A | G | 0.468018 |
| rs4546885 | 1 | 183025555 | -0.0728 | 0.0123 | 3.15E-09 | C | G | 0.434203 |
| rs28798069 | 1 | 224438833 | -0.0598 | 0.013 | 4.22E-06 | G | A | 0.55513 |
| rs72647460 | 1 | 22557354 | -0.1774 | 0.0361 | 8.77E-07 | T | C | 0.0704296 |
| rs12025420 | 1 | 222148343 | 0.1069 | 0.0141 | 2.84E-14 | A | G | 0.24074 |
| rs72826124 | 2 | 104916571 | 0.1707 | 0.0358 | 1.90E-06 | A | G | 0.0663267 |
| rs76154567 | 2 | 48587963 | -0.0959 | 0.0209 | 4.63E-06 | T | A | 0.084465 |
| rs6808387 | 3 | 53079732 | 0.0581 | 0.0127 | 4.63E-06 | T | C | 0.534707 |
| rs72942485 | 3 | 112999560 | -0.1441 | 0.0292 | 8.07E-07 | A | G | 0.0318842 |
| rs114717436 | 3 | 28450527 | 0.5293 | 0.0988 | 8.52E-08 | G | A | 0.00811158 |
| rs13075993 | 3 | 41260017 | -0.0665 | 0.0137 | 1.32E-06 | A | G | 0.386438 |
| rs57064586 | 3 | 133745796 | -0.0965 | 0.0153 | 2.75E-10 | C | A | 0.166285 |
| rs6445419 | 3 | 64613444 | -0.0607 | 0.0123 | 8.08E-07 | G | C | 0.442281 |
| rs12500053 | 4 | 177442955 | 0.0685 | 0.0134 | 3.12E-07 | G | A | 0.345143 |
| rs380016 | 4 | 48296382 | -0.0614 | 0.013 | 2.32E-06 | T | C | 0.445513 |
| rs36030967 | 4 | 69315548 | -0.0735 | 0.0156 | 2.41E-06 | T | G | 0.596023 |
| rs72746180 | 5 | 40240420 | 0.1096 | 0.0176 | 4.75E-10 | C | A | 0.21641 |
| rs2853672 | 5 | 1292983 | 0.0865 | 0.0125 | 4.58E-12 | A | C | 0.542294 |
| rs641455 | 5 | 134472374 | -0.0695 | 0.013 | 9.09599E-08 | G | A | 0.583298 |
| rs7722513 | 5 | 134464066 | -0.1106 | 0.0131 | 3.07468E-17 | G | C | 0.538409 |
| rs9276826 | 6 | 32830568 | -0.1256 | 0.0242 | 2.12902E-07 | G | A | 0.0857332 |
| rs6911915 | 6 | 117809031 | 0.0593 | 0.0123 | 1.45999E-06 | C | T | 0.449741 |
| rs6933790 | 6 | 41672769 | -0.0724 | 0.015 | 1.28399E-06 | C | T | 0.200782 |
| rs372351316 | 7 | 148062881 | 0.179 | 0.0381 | 2.64198E-06 | C | T | 0.0806238 |
| rs3735491 | 7 | 45116468 | -0.0849 | 0.0156 | 4.91496E-08 | A | C | 0.241117 |
| rs148847092 | 8 | 16819872 | 0.2669 | 0.0578 | 3.93704E-06 | T | G | 0.0266771 |
| rs7838174 | 8 | 117715731 | 0.1191 | 0.0255 | 0.000003133 | T | C | 0.0803514 |
| rs6983267 | 8 | 128413305 | -0.1552 | 0.0125 | 2.11106E-35 | T | G | 0.528602 |
| rs2511653 | 8 | 117621592 | -0.0912 | 0.0136 | 2.25788E-11 | T | C | 0.24552 |
| rs61237993 | 9 | 34130435 | 0.0844 | 0.0143 | 3.50203E-09 | A | G | 0.238061 |
| rs77260348 | 9 | 112066092 | -0.1001 | 0.0207 | 0.00000138 | C | T | 0.137855 |
| rs10811654 | 9 | 22092924 | -0.0736 | 0.0122 | 1.58701E-09 | G | A | 0.473941 |
| rs16924533 | 9 | 548464 | 0.182 | 0.038 | 1.66498E-06 | C | A | 0.0590119 |
| rs2193352 | 10 | 101346609 | 0.0788 | 0.0156 | 4.49097E-07 | G | A | 0.183522 |
| rs72777082 | 10 | 8738285 | -0.1257 | 0.0128 | 6.63743E-23 | A | G | 0.343621 |
| rs12241008 | 10 | 114280702 | 0.1183 | 0.016 | 1.54383E-13 | C | T | 0.141278 |
| rs7897438 | 10 | 114732307 | 0.0733 | 0.0141 | 1.86599E-07 | A | C | 0.334625 |
| rs704017 | 10 | 80819132 | 0.0887 | 0.0126 | 1.63418E-12 | G | A | 0.53242 |
| rs11607100 | 11 | 74414919 | -0.218 | 0.045 | 0.000001242 | T | C | 0.042197 |
| rs7130173 | 11 | 111154072 | -0.0931 | 0.0131 | 1.3471E-12 | C | A | 0.705132 |
| rs11236199 | 11 | 74372485 | 0.0639 | 0.0123 | 2.06001E-07 | C | T | 0.475718 |
| rs3782121 | 11 | 205935 | -0.1091 | 0.0218 | 5.67701E-07 | A | G | 0.0609857 |
| rs617343 | 11 | 74222106 | 0.0662 | 0.0126 | 1.38899E-07 | C | G | 0.615122 |
| rs174570 | 11 | 61597212 | -0.0732 | 0.0142 | 0.000000252 | T | C | 0.218968 |
| rs4757379 | 11 | 16014954 | 0.0683 | 0.0125 | 4.21697E-08 | T | C | 0.495416 |
| rs11065774 | 12 | 111355326 | -0.1077 | 0.0205 | 1.42298E-07 | A | G | 0.115316 |
| rs10880358 | 12 | 43130804 | 0.0599 | 0.0124 | 1.36899E-06 | G | C | 0.508414 |
| rs1052651 | 12 | 96052721 | -0.0739 | 0.0135 | 4.28904E-08 | A | G | 0.359983 |
| rs1265566 | 12 | 111716376 | -0.0634 | 0.0131 | 1.19399E-06 | T | C | 0.670482 |
| rs12822620 | 12 | 4379831 | 0.1137 | 0.0163 | 2.8327E-12 | T | C | 0.217421 |
| rs7398375 | 12 | 57540848 | -0.068 | 0.0135 | 4.469E-07 | G | C | 0.367105 |
| rs8001158 | 13 | 111075658 | 0.1274 | 0.0202 | 2.80098E-10 | G | T | 0.635914 |
| rs6562764 | 13 | 73977318 | 0.0921 | 0.019 | 1.23299E-06 | C | T | 0.919814 |
| rs189946980 | 14 | 43473215 | 0.6711 | 0.1362 | 8.337E-07 | C | T | 0.03511 |
| rs8022952 | 14 | 51394480 | 0.0798 | 0.0132 | 1.33601E-09 | T | C | 0.333474 |
| rs35654509 | 14 | 105545105 | 0.0685 | 0.0134 | 3.50703E-07 | G | C | 0.288674 |
| rs185619695 | 14 | 40932472 | 0.35 | 0.0761 | 4.22396E-06 | C | T | 0.0130669 |
| rs79207432 | 15 | 33011697 | 0.1686 | 0.0225 | 6.06457E-14 | C | G | 0.21414 |
| rs3809569 | 15 | 66999828 | -0.0937 | 0.0162 | 6.68405E-09 | G | A | 0.211745 |
| rs144674978 | 15 | 33149751 | 0.4851 | 0.096 | 4.37401E-07 | T | C | 0.00856068 |
| rs7194355 | 16 | 68770288 | -0.0785 | 0.0146 | 7.70708E-08 | A | C | 0.251993 |
| rs1078643 | 17 | 10707241 | 0.089 | 0.0146 | 1.258E-09 | A | G | 0.773826 |
| rs76409885 | 17 | 81064661 | 0.0867 | 0.0135 | 1.54301E-10 | T | C | 0.582116 |
| rs4468717 | 18 | 3457606 | -0.1509 | 0.0321 | 2.64101E-06 | T | C | 0.0954037 |
| rs11874392 | 18 | 46453156 | -0.1573 | 0.0126 | 5.79562E-36 | T | A | 0.523412 |
| rs28570619 | 19 | 33517152 | -0.1626 | 0.0279 | 5.48605E-09 | A | G | 0.0542954 |
| rs2867621 | 19 | 32057918 | 0.2164 | 0.0429 | 4.44703E-07 | A | G | 0.0302569 |
| rs2423154 | 20 | 6392681 | -0.0884 | 0.0153 | 7.52194E-09 | A | G | 0.718213 |
| rs6066825 | 20 | 47340117 | -0.0943 | 0.0129 | 3.14702E-13 | G | A | 0.335206 |
| rs6103574 | 20 | 42657984 | 0.0666 | 0.0138 | 0.000001367 | G | T | 0.729126 |
| rs6012927 | 20 | 49036638 | 0.0676 | 0.0132 | 3.25297E-07 | G | A | 0.330827 |
| rs2427313 | 20 | 60970675 | -0.1003 | 0.0165 | 1.14301E-09 | A | G | 0.228206 |
| rs990930 | 20 | 6693578 | 0.0563 | 0.0123 | 4.74898E-06 | G | T | 0.481717 |
| rs6086196 | 20 | 7749957 | 0.1035 | 0.0138 | 6.16453E-14 | G | A | 0.249324 |
| rs143058554 | 22 | 45535850 | 0.3759 | 0.0765 | 9.07904E-07 | C | A | 0.0147212 |

Tabls S4. Genes related to AA & HBDC & CRC.

|  |  |  | HBDC|AA|CRC |  |  |  |  |
| --- | --- | --- | --- | --- | --- | --- | --- |
| CDKN2A | MIR133B | F3 | TNFRSF1B | CXCL9 | TACR1 | FLG | FCRL3 |
| H19 | IL4 | ATP4A | CYP27B1 | ADAM17 | HSD11B1 | PRKCQ | PLCB3 |
| HRAS | IL1RN | ADIPOQ | VIP | TLR7 | ACP1 | ERAP1 | LRRC32 |
| BLM | LEP | IL2RA | BCL2L11 | CXCR3 | RBP1 | IARS1 | HEMGN |
| STAT3 | TLR2 | HDAC1 | CD80 | IL15 | CD22 | IL23A | PSMG2 |
| TGFB1 | SPP1 | F5 | BDNF | CCL4 | CAMP | PTPN22 | BCL2L15 |
| TNF | PDCD1 | MIR30B | DSP | NES | TXNRD1 | PFKFB3 | MYO9A |
| IL6 | MTHFR | HLA-DQB1 | LTA | CD1D | ITGAL | COLQ |  |
| GAS5 | SOD2 | ITCH | IDO1 | PRTN3 | KLK7 | DEFB4A |  |
| IL1B | CERNA3 | CCL5 | HLA-DQA1 | CD58 | TLR5 | PTPN2 |  |
| IFNG | BMP6 | NR3C1 | CXCL1 | CD55 | SLC11A1 | IL1RAPL2 |  |
| MUC1 | IRF1 | TNFRSF1A | IFNGR1 | FCGR3A | PRDX5 | PLEC |  |
| MIR155 | CCL2 | CD40 | ENO1 | ITGB4 | NSUN2 | ZMPSTE24 |  |
| MIR34A | IFNA2 | SIRT1 | MX1 | CRH | KRT17 | VTRNA1-1 |  |
| ALB | IL17A | CCR5 | SH2B3 | ATP12A | VEGFB | FCGR1A |  |
| GPT | JAK1 | JAK3 | CD19 | IL4R | TNFRSF4 | FPR2 |  |
| IL10 | HLA-B | IL13 | ANPEP | STAT4 | KRT1 | CD69 |  |
| ERBB3 | BIRC5 | TCF7 | CD28 | TSLP | FCGR3B | ATXN2 |  |
| FAS | DNMT1 | CALCA | HLA-G | IL16 | CHAT | CSN1S1 |  |
| KRT7 | HLA-A | LINC02605 | NOTCH4 | ICOS | ECM1 | NLRP1 |  |
| CXCL8 | NKX2-1 | NOS3 | BAD | IRF8 | DSG1 | NIPAL4 |  |
| IL2 | FOXP3 | HAVCR1 | MIF | NTS | ENTPD1 | DSG3 |  |
| INS | SST | IL5 | MEFV | MIR17HG | IL23R | CENPB |  |
| FASLG | CD4 | FLT3 | IL22 | TNFRSF13B | IL21 | STX2 |  |
| VDR | IL18 | SOD2-OT1 | KLRK1 | ITGB2 | ACP5 | RBP3 |  |
| MMP9 | MAPK14 | IFNB1 | CD86 | STS | FCGR2A | HHAT |  |
| EGF | CD40LG | BDNF-AS | IKBKG | PSMB9 | C4A | PRG2 |  |
| IFNA1 | CXCL12 | ALDH2 | LTF | TTN | TRPS1 | A1CF |  |
| CD274 | HAVCR2 | TLR9 | XDH | CBLB | IL17F | IL31 |  |
| ITGB1 | TCF7L2 | MIR30D | SELE | LAMB3 | CCL11 | VAMP1 |  |
| TLR4 | IL1A | DPP4 | SREBF1 | ABCC6 | CCR4 | TXNRD2 |  |
| CBS | SERPINE1 | DKK1 | OCLN | PGF | IL9 | WDR11 |  |
| CTLA4 | FN1 | IL12A | GZMB | CR2 | DUSP22 | SLC5A7 |  |
| HLA-DRB1 | CXCL10 | CD79A | TYK2 | ACE2 | DNASE1 | PSTPIP1 |  |
| ACTB | CD8A | HSPD1 | FPR1 | CLDN3 | TRIM27 | GAD2 |  |
| ICAM1 | SOD1 | GAPDH | IRF5 | NPY | IGKC | TNFSF18 |  |
| CRP | CALR | PHB2 | CIITA | MICA | MUSK | PADI4 |  |
| LMNA | CHD4 | TG | CCL3 | CCR1 | NTF3 | MAN2A1 |  |
| CASP3 | SOCS1 | VCAM1 | IL1R1 | ZAP70 | CXCL2 | COL13A1 |  |
| TP63 | TF | MBL2 | TRPV1 | TPO | MBP | EBI3 |  |

AA= Alopecia areata. HBDC= Hepatic bile duct cancer. CRC= Colorectal cancer.

Table S5. GO and KEGG enrichment result.

| Term | BP | Count | % | PValue | Bonferroni | Benjamini | FDR |
| --- | --- | --- | --- | --- | --- | --- | --- |
| GO:0006954 | inflammatory response | 68 | 23.69337979 | 3.18E-51 | 8.59E-48 | 8.59E-48 | 7.78E-48 |
| GO:0006955 | immune response | 72 | 25.08710801 | 1.27E-50 | 3.44E-47 | 1.72E-47 | 1.56E-47 |
| GO:0032729 | positive regulation of type II interferon production | 24 | 8.362369338 | 1.77E-24 | 4.79E-21 | 1.60E-21 | 1.44E-21 |
| GO:0010628 | positive regulation of gene expression | 44 | 15.33101045 | 1.93E-21 | 5.23E-18 | 1.31E-18 | 1.18E-18 |
| GO:0032735 | positive regulation of interleukin-12 production | 18 | 6.271777003 | 9.92E-21 | 2.68E-17 | 5.36E-18 | 4.85E-18 |
| GO:0071222 | cellular response to lipopolysaccharide | 28 | 9.756097561 | 1.80E-19 | 4.87E-16 | 8.11E-17 | 7.34E-17 |
| GO:0042531 | positive regulation of tyrosine phosphorylation of STAT protein | 19 | 6.620209059 | 1.34E-18 | 3.62E-15 | 5.17E-16 | 4.67E-16 |
| GO:0019221 | cytokine-mediated signaling pathway | 25 | 8.710801394 | 2.26E-18 | 6.09E-15 | 7.62E-16 | 6.89E-16 |
| GO:0042102 | positive regulation of T cell proliferation | 18 | 6.271777003 | 6.18E-18 | 1.67E-14 | 1.86E-15 | 1.68E-15 |
| GO:0050729 | positive regulation of inflammatory response | 20 | 6.968641115 | 1.16E-15 | 3.00E-12 | 3.12E-13 | 2.83E-13 |
| GO:0008284 | positive regulation of cell population proliferation | 36 | 12.54355401 | 7.39E-15 | 2.01E-11 | 1.70E-12 | 1.54E-12 |
| GO:0032496 | response to lipopolysaccharide | 21 | 7.317073171 | 7.55E-15 | 2.04E-11 | 1.70E-12 | 1.54E-12 |
| GO:0007166 | cell surface receptor signaling pathway | 29 | 10.10452962 | 1.44E-14 | 3.90E-11 | 3.00E-12 | 2.72E-12 |
| GO:0032755 | positive regulation of interleukin-6 production | 18 | 6.271777003 | 8.07E-14 | 2.18E-10 | 1.56E-11 | 1.41E-11 |
| GO:0006935 | chemotaxis | 19 | 6.620209059 | 9.59E-14 | 2.59E-10 | 1.73E-11 | 1.56E-11 |
| GO:0032757 | positive regulation of interleukin-8 production | 15 | 5.226480836 | 2.23E-13 | 6.02E-10 | 3.76E-11 | 3.41E-11 |
| GO:0098586 | cellular response to virus | 17 | 5.923344948 | 2.68E-13 | 7.24E-10 | 4.26E-11 | 3.85E-11 |
| GO:0032760 | positive regulation of tumor necrosis factor production | 18 | 6.271777003 | 3.37E-13 | 9.10E-10 | 5.05E-11 | 4.57E-11 |
| GO:0032733 | positive regulation of interleukin-10 production | 13 | 4.529616725 | 3.66E-13 | 9.88E-10 | 5.20E-11 | 4.71E-11 |
| GO:0070098 | chemokine-mediated signaling pathway | 15 | 5.226480836 | 8.35E-13 | 2.25E-09 | 1.13E-10 | 1.02E-10 |
| GO:0007165 | signal transduction | 53 | 18.46689895 | 1.07E-12 | 2.88E-09 | 1.37E-10 | 1.24E-10 |
| GO:0002639 | positive regulation of immunoglobulin production | 11 | 3.832752613 | 1.79E-12 | 4.83E-09 | 2.20E-10 | 1.99E-10 |
| GO:0010629 | negative regulation of gene expression | 26 | 9.059233449 | 2.30E-12 | 6.21E-09 | 2.70E-10 | 2.44E-10 |
| GO:0006959 | humoral immune response | 14 | 4.87804878 | 3.63E-12 | 9.81E-09 | 4.09E-10 | 3.70E-10 |
| GO:0050830 | defense response to Gram-positive bacterium | 18 | 6.271777003 | 4.62E-12 | 1.25E-08 | 4.99E-10 | 4.52E-10 |
| GO:0001819 | positive regulation of cytokine production | 14 | 4.87804878 | 1.02E-11 | 2.76E-08 | 1.06E-09 | 9.61E-10 |
| GO:0032722 | positive regulation of chemokine production | 12 | 4.181184669 | 1.37E-11 | 3.71E-08 | 1.37E-09 | 1.24E-09 |
| GO:0007267 | cell-cell signaling | 22 | 7.665505226 | 1.89E-11 | 5.10E-08 | 1.82E-09 | 1.65E-09 |
| GO:0030183 | B cell differentiation | 15 | 5.226480836 | 3.04E-11 | 8.20E-08 | 2.83E-09 | 2.56E-09 |
| GO:0042130 | negative regulation of T cell proliferation | 12 | 4.181184669 | 5.07E-11 | 1.37E-07 | 4.56E-09 | 4.13E-09 |
| GO:0032740 | positive regulation of interleukin-17 production | 10 | 3.484320557 | 7.21E-11 | 1.95E-07 | 6.28E-09 | 5.68E-09 |
| GO:0006915 | apoptotic process | 33 | 11.49825784 | 8.33E-11 | 2.25E-07 | 7.03E-09 | 6.36E-09 |
| GO:0045087 | innate immune response | 31 | 10.80139373 | 1.40E-10 | 3.77E-07 | 1.14E-08 | 1.03E-08 |
| GO:0001774 | microglial cell activation | 10 | 3.484320557 | 1.50E-10 | 4.06E-07 | 1.19E-08 | 1.08E-08 |
| GO:0045766 | positive regulation of angiogenesis | 18 | 6.271777003 | 1.58E-10 | 4.27E-07 | 1.22E-08 | 1.10E-08 |
| GO:0051897 | positive regulation of phosphatidylinositol 3-kinase/protein kinase B signal transduction | 19 | 6.620209059 | 2.65E-10 | 7.16E-07 | 1.99E-08 | 1.80E-08 |
| GO:0061844 | antimicrobial humoral immune response mediated by antimicrobial peptide | 15 | 5.226480836 | 4.24E-10 | 1.15E-06 | 3.10E-08 | 2.80E-08 |
| GO:0001666 | response to hypoxia | 18 | 6.271777003 | 5.77E-10 | 1.56E-06 | 4.10E-08 | 3.71E-08 |
| GO:0070374 | positive regulation of ERK1 and ERK2 cascade | 20 | 6.968641115 | 6.27E-10 | 1.69E-06 | 4.34E-08 | 3.93E-08 |
| GO:0030890 | positive regulation of B cell proliferation | 11 | 3.832752613 | 6.83E-10 | 1.84E-06 | 4.61E-08 | 4.17E-08 |
|  |  |  |  |  |  |  |  |
| Term | CC | Count | % | PValue | Bonferroni | Benjamini | FDR |
| GO:0005615 | extracellular space | 115 | 40.06968641 | 1.74E-43 | 6.80E-41 | 6.80E-41 | 6.40E-41 |
| GO:0009897 | external side of plasma membrane | 58 | 20.20905923 | 4.20E-40 | 1.64E-37 | 8.19E-38 | 7.70E-38 |
| GO:0005576 | extracellular region | 100 | 34.84320557 | 1.08E-30 | 4.20E-28 | 1.40E-28 | 1.32E-28 |
| GO:0009986 | cell surface | 54 | 18.81533101 | 2.17E-26 | 8.47E-24 | 2.12E-24 | 1.99E-24 |
| GO:0005886 | plasma membrane | 135 | 47.03832753 | 2.73E-14 | 1.07E-11 | 2.13E-12 | 2.01E-12 |
| GO:0070062 | extracellular exosome | 73 | 25.43554007 | 1.41E-12 | 5.51E-10 | 9.18E-11 | 8.64E-11 |
| GO:0045121 | membrane raft | 18 | 6.271777003 | 4.16E-09 | 1.62E-06 | 2.32E-07 | 2.18E-07 |
| GO:0005788 | endoplasmic reticulum lumen | 20 | 6.968641115 | 4.63E-08 | 1.81E-05 | 2.26E-06 | 2.13E-06 |
| GO:0043235 | receptor complex | 16 | 5.574912892 | 4.13E-07 | 1.61E-04 | 1.79E-05 | 1.69E-05 |
| GO:0032991 | protein-containing complex | 26 | 9.059233449 | 6.13E-06 | 0.002387325 | 2.28E-04 | 2.15E-04 |
| GO:0098553 | lumenal side of endoplasmic reticulum membrane | 7 | 2.43902439 | 6.44E-06 | 0.002508471 | 2.28E-04 | 2.15E-04 |
| GO:0062023 | collagen-containing extracellular matrix | 19 | 6.620209059 | 1.10E-05 | 0.004284385 | 3.58E-04 | 3.37E-04 |
| GO:0101003 | ficolin-1-rich granule membrane | 8 | 2.787456446 | 1.70E-05 | 0.006594682 | 5.09E-04 | 4.79E-04 |
| GO:0001772 | immunological synapse | 7 | 2.43902439 | 3.28E-05 | 0.012727821 | 9.15E-04 | 8.61E-04 |
| GO:0012507 | ER to Golgi transport vesicle membrane | 7 | 2.43902439 | 1.37E-04 | 0.051876114 | 0.003551098 | 0.003341674 |
| GO:0001533 | cornified envelope | 7 | 2.43902439 | 1.50E-04 | 0.056851077 | 0.003657918 | 0.003442195 |
| GO:0043025 | neuronal cell body | 16 | 5.574912892 | 1.93E-04 | 0.072661813 | 0.004437039 | 0.004175368 |
| GO:0031093 | platelet alpha granule lumen | 7 | 2.43902439 | 3.00E-04 | 0.110443386 | 0.006500809 | 0.006117428 |
| GO:0042613 | MHC class II protein complex | 5 | 1.742160279 | 3.74E-04 | 0.135907669 | 0.007403605 | 0.006966982 |
| GO:0030669 | clathrin-coated endocytic vesicle membrane | 7 | 2.43902439 | 3.80E-04 | 0.137655311 | 0.007403605 | 0.006966982 |
| GO:0030667 | secretory granule membrane | 8 | 2.787456446 | 4.51E-04 | 0.161166179 | 0.008366813 | 0.007873385 |
| GO:0031901 | early endosome membrane | 11 | 3.832752613 | 5.08E-04 | 0.179834945 | 0.00866897 | 0.008157723 |
| GO:0010008 | endosome membrane | 13 | 4.529616725 | 5.11E-04 | 0.180808419 | 0.00866897 | 0.008157723 |
| GO:0030670 | phagocytic vesicle membrane | 7 | 2.43902439 | 0.001054665 | 0.337368591 | 0.017138306 | 0.016127585 |
| GO:0098636 | protein complex involved in cell adhesion | 3 | 1.045296167 | 0.001743533 | 0.493672366 | 0.027199114 | 0.025595064 |
| GO:0016020 | membrane | 89 | 31.01045296 | 0.003282431 | 0.722588603 | 0.049236465 | 0.046332776 |
| GO:0042612 | MHC class I protein complex | 3 | 1.045296167 | 0.00605793 | 0.90649852 | 0.081936815 | 0.077104644 |
| GO:0043196 | varicosity | 3 | 1.045296167 | 0.00605793 | 0.90649852 | 0.081936815 | 0.077104644 |
| GO:0008305 | integrin complex | 4 | 1.393728223 | 0.006093691 | 0.907801383 | 0.081936815 | 0.077104644 |
| GO:0005829 | cytosol | 96 | 33.44947735 | 0.006302832 | 0.915066245 | 0.081936815 | 0.077104644 |
| GO:0048471 | perinuclear region of cytoplasm | 20 | 6.968641115 | 0.007155171 | 0.939223238 | 0.08940938 | 0.084136519 |
| GO:0005737 | cytoplasm | 97 | 33.79790941 | 0.007561401 | 0.948188952 | 0.08940938 | 0.084136519 |
| GO:0000139 | Golgi membrane | 19 | 6.620209059 | 0.007565409 | 0.9482705 | 0.08940938 | 0.084136519 |
| GO:0005769 | early endosome | 11 | 3.832752613 | 0.010389961 | 0.982978572 | 0.119178964 | 0.112150461 |
| GO:0031234 | extrinsic component of cytoplasmic side of plasma membrane | 4 | 1.393728223 | 0.011366109 | 0.988416422 | 0.126650932 | 0.119181775 |
| GO:0030666 | endocytic vesicle membrane | 5 | 1.742160279 | 0.017479539 | 0.998969079 | 0.189361673 | 0.178194189 |
| GO:0005765 | lysosomal membrane | 12 | 4.181184669 | 0.020527687 | 0.999693137 | 0.216372922 | 0.203612467 |
| GO:0016324 | apical plasma membrane | 12 | 4.181184669 | 0.023075755 | 0.999888892 | 0.236830113 | 0.222863209 |
| GO:0034687 | integrin alphaL-beta2 complex | 2 | 0.696864111 | 0.026631862 | 0.999973203 | 0.266318617 | 0.250612647 |
| GO:0098992 | neuronal dense core vesicle | 3 | 1.045296167 | 0.031800006 | 0.99999664 | 0.297721579 | 0.280163639 |
|  |  |  |  |  |  |  |  |
| Term | MF | Count | % | PValue | Bonferroni | Benjamini | FDR |
| GO:0005125 | cytokine activity | 38 | 13.24041812 | 8.44E-31 | 5.31E-28 | 5.31E-28 | 4.94E-28 |
| GO:0005515 | protein binding | 242 | 84.32055749 | 2.72E-15 | 1.75E-12 | 8.57E-13 | 7.97E-13 |
| GO:0005102 | signaling receptor binding | 29 | 10.10452962 | 7.81E-13 | 4.92E-10 | 1.64E-10 | 1.53E-10 |
| GO:0004888 | transmembrane signaling receptor activity | 18 | 6.271777003 | 1.24E-09 | 7.79E-07 | 1.66E-07 | 1.55E-07 |
| GO:0005126 | cytokine receptor binding | 9 | 3.135888502 | 1.46E-09 | 9.22E-07 | 1.66E-07 | 1.55E-07 |
| GO:0001618 | virus receptor activity | 13 | 4.529616725 | 1.58E-09 | 9.98E-07 | 1.66E-07 | 1.55E-07 |
| GO:0008083 | growth factor activity | 17 | 5.923344948 | 2.22E-09 | 1.40E-06 | 1.83E-07 | 1.71E-07 |
| GO:0008009 | chemokine activity | 11 | 3.832752613 | 2.48E-09 | 1.56E-06 | 1.83E-07 | 1.71E-07 |
| GO:0042802 | identical protein binding | 58 | 20.20905923 | 2.62E-09 | 1.65E-06 | 1.83E-07 | 1.71E-07 |
| GO:0002020 | protease binding | 14 | 4.87804878 | 1.57E-08 | 9.87E-06 | 9.87E-07 | 9.18E-07 |
| GO:0038023 | signaling receptor activity | 18 | 6.271777003 | 3.05E-08 | 1.92E-05 | 1.74E-06 | 1.62E-06 |
| GO:0045236 | CXCR chemokine receptor binding | 7 | 2.43902439 | 3.79E-08 | 2.39E-05 | 1.99E-06 | 1.85E-06 |
| GO:0005178 | integrin binding | 14 | 4.87804878 | 6.65E-07 | 4.19E-04 | 3.22E-05 | 3.00E-05 |
| GO:0031730 | CCR5 chemokine receptor binding | 5 | 1.742160279 | 1.42E-06 | 8.97E-04 | 6.41E-05 | 5.96E-05 |
| GO:0042056 | chemoattractant activity | 8 | 2.787456446 | 2.89E-06 | 0.001821593 | 1.22E-04 | 1.13E-04 |
| GO:0005149 | interleukin-1 receptor binding | 5 | 1.742160279 | 5.07E-05 | 0.0314363 | 0.001996264 | 0.001856842 |
| GO:0019770 | IgG receptor activity | 4 | 1.393728223 | 1.57E-04 | 0.094090072 | 0.005812214 | 0.005406282 |
| GO:0015026 | coreceptor activity | 7 | 2.43902439 | 2.01E-04 | 0.118834721 | 0.007027631 | 0.006536813 |
| GO:0042605 | peptide antigen binding | 7 | 2.43902439 | 3.15E-04 | 0.179843041 | 0.010362328 | 0.00963861 |
| GO:0005031 | tumor necrosis factor receptor activity | 4 | 1.393728223 | 3.29E-04 | 0.187208503 | 0.010362328 | 0.00963861 |
| GO:0038187 | pattern recognition receptor activity | 5 | 1.742160279 | 4.19E-04 | 0.232269297 | 0.012583848 | 0.011704976 |
| GO:0004896 | cytokine receptor activity | 6 | 2.090592334 | 4.56E-04 | 0.249634515 | 0.013051338 | 0.012139816 |
| GO:0002039 | p53 binding | 7 | 2.43902439 | 5.53E-04 | 0.294106828 | 0.01450813 | 0.013494863 |
| GO:0048018 | receptor ligand activity | 7 | 2.43902439 | 5.53E-04 | 0.294106828 | 0.01450813 | 0.013494863 |
| GO:0019864 | IgG binding | 4 | 1.393728223 | 5.90E-04 | 0.310663819 | 0.014876655 | 0.013837651 |
| GO:0048020 | CCR chemokine receptor binding | 5 | 1.742160279 | 7.53E-04 | 0.377742984 | 0.017335375 | 0.016124651 |
| GO:0004726 | non-membrane spanning protein tyrosine phosphatase activity | 4 | 1.393728223 | 7.59E-04 | 0.380311487 | 0.017335375 | 0.016124651 |
| GO:0004713 | protein tyrosine kinase activity | 8 | 2.787456446 | 7.70E-04 | 0.384658323 | 0.017335375 | 0.016124651 |
| GO:0005179 | hormone activity | 8 | 2.787456446 | 9.63E-04 | 0.455113879 | 0.020927102 | 0.019465527 |
| GO:0019899 | enzyme binding | 15 | 5.226480836 | 0.001057537 | 0.486549247 | 0.022208287 | 0.020657232 |
| GO:0042803 | protein homodimerization activity | 23 | 8.013937282 | 0.001308971 | 0.561849042 | 0.026601664 | 0.02474377 |
| GO:0061809 | NAD+ nucleotidase, cyclic ADP-ribose generating | 4 | 1.393728223 | 0.001439933 | 0.596593886 | 0.02834868 | 0.026368772 |
| GO:0019903 | protein phosphatase binding | 7 | 2.43902439 | 0.001808689 | 0.680342626 | 0.033138405 | 0.030823977 |
| GO:1990782 | protein tyrosine kinase binding | 6 | 2.090592334 | 0.001841023 | 0.686799947 | 0.033138405 | 0.030823977 |
| GO:0008236 | serine-type peptidase activity | 6 | 2.090592334 | 0.001841023 | 0.686799947 | 0.033138405 | 0.030823977 |
| GO:0005134 | interleukin-2 receptor binding | 3 | 1.045296167 | 0.00200811 | 0.718150272 | 0.034973492 | 0.032530899 |
| GO:0004950 | chemokine receptor activity | 4 | 1.393728223 | 0.002053999 | 0.726197983 | 0.034973492 | 0.032530899 |
| GO:0001530 | lipopolysaccharide binding | 5 | 1.742160279 | 0.00255882 | 0.800934735 | 0.04242254 | 0.039459696 |
| GO:0030246 | carbohydrate binding | 10 | 3.484320557 | 0.002889085 | 0.838420517 | 0.045844815 | 0.042642955 |
| GO:0031726 | CCR1 chemokine receptor binding | 3 | 1.045296167 | 0.002983551 | 0.847782826 | 0.045844815 | 0.042642955 |
|  |  |  |  |  |  |  |  |
| Term | KEGG | Count | % | PValue | Bonferroni | Benjamini | FDR |
| hsa04060 | Cytokine-cytokine receptor interaction | 61 | 21.2543554 | 2.64E-36 | 7.44E-34 | 7.44E-34 | 5.33E-34 |
| hsa05321 | Inflammatory bowel disease | 30 | 10.45296167 | 9.13E-29 | 2.57E-26 | 1.29E-26 | 9.22E-27 |
| hsa05323 | Rheumatoid arthritis | 30 | 10.45296167 | 2.66E-23 | 7.50E-21 | 2.50E-21 | 1.79E-21 |
| hsa04940 | Type I diabetes mellitus | 22 | 7.665505226 | 3.86E-22 | 1.09E-19 | 2.72E-20 | 1.95E-20 |
| hsa05330 | Allograft rejection | 21 | 7.317073171 | 5.40E-22 | 1.52E-19 | 3.05E-20 | 2.18E-20 |
| hsa04659 | Th17 cell differentiation | 30 | 10.45296167 | 2.11E-21 | 5.96E-19 | 9.93E-20 | 7.12E-20 |
| hsa05320 | Autoimmune thyroid disease | 23 | 8.013937282 | 3.39E-21 | 9.56E-19 | 1.37E-19 | 9.79E-20 |
| hsa05152 | Tuberculosis | 35 | 12.19512195 | 1.19E-19 | 3.36E-17 | 4.19E-18 | 3.00E-18 |
| hsa05144 | Malaria | 21 | 7.317073171 | 5.58E-19 | 1.57E-16 | 1.75E-17 | 1.25E-17 |
| hsa04620 | Toll-like receptor signaling pathway | 27 | 9.407665505 | 6.95E-18 | 1.96E-15 | 1.96E-16 | 1.40E-16 |
| hsa04630 | JAK-STAT signaling pathway | 32 | 11.14982578 | 1.10E-17 | 3.11E-15 | 2.83E-16 | 2.03E-16 |
| hsa05417 | Lipid and atherosclerosis | 35 | 12.19512195 | 4.38E-17 | 1.24E-14 | 1.03E-15 | 7.38E-16 |
| hsa05145 | Toxoplasmosis | 26 | 9.059233449 | 1.34E-16 | 3.13E-14 | 2.91E-15 | 2.08E-15 |
| hsa05164 | Influenza A | 31 | 10.80139373 | 1.94E-16 | 6.26E-14 | 3.91E-15 | 2.80E-15 |
| hsa05142 | Chagas disease | 25 | 8.710801394 | 2.44E-16 | 6.26E-14 | 4.58E-15 | 3.28E-15 |
| hsa05332 | Graft-versus-host disease | 18 | 6.271777003 | 5.31E-16 | 1.57E-13 | 9.36E-15 | 6.71E-15 |
| hsa05140 | Leishmaniasis | 22 | 7.665505226 | 6.16E-16 | 1.88E-13 | 1.02E-14 | 7.32E-15 |
| hsa04061 | Viral protein interaction with cytokine and cytokine receptor | 24 | 8.362369338 | 1.54E-15 | 4.38E-13 | 2.41E-14 | 1.72E-14 |
| hsa04672 | Intestinal immune network for IgA production | 18 | 6.271777003 | 4.64E-15 | 1.31E-12 | 6.89E-14 | 4.93E-14 |
| hsa05169 | Epstein-Barr virus infection | 31 | 10.80139373 | 2.33E-14 | 6.57E-12 | 3.29E-13 | 2.36E-13 |
| hsa04668 | TNF signaling pathway | 24 | 8.362369338 | 8.57E-14 | 2.42E-11 | 1.15E-12 | 8.24E-13 |
| hsa04514 | Cell adhesion molecules | 27 | 9.407665505 | 8.97E-14 | 2.53E-11 | 1.15E-12 | 8.24E-13 |
| hsa04640 | Hematopoietic cell lineage | 22 | 7.665505226 | 1.56E-13 | 4.39E-11 | 1.91E-12 | 1.37E-12 |
| hsa05143 | African trypanosomiasis | 15 | 5.226480836 | 3.19E-13 | 8.98E-11 | 3.72E-12 | 2.66E-12 |
| hsa05162 | Measles | 25 | 8.710801394 | 3.29E-13 | 9.29E-11 | 3.72E-12 | 2.66E-12 |
| hsa04658 | Th1 and Th2 cell differentiation | 21 | 7.317073171 | 3.70E-13 | 1.04E-10 | 4.01E-12 | 2.87E-12 |
| hsa04936 | Alcoholic liver disease | 25 | 8.710801394 | 7.37E-13 | 2.08E-10 | 7.69E-12 | 5.51E-12 |
| hsa05163 | Human cytomegalovirus infection | 30 | 10.45296167 | 2.59E-12 | 7.30E-10 | 2.61E-11 | 1.87E-11 |
| hsa05167 | Kaposi sarcoma-associated herpesvirus infection | 28 | 9.756097561 | 2.83E-12 | 7.98E-10 | 2.75E-11 | 1.97E-11 |
| hsa05200 | Pathways in cancer | 46 | 16.02787456 | 6.47E-12 | 1.83E-09 | 6.08E-11 | 4.36E-11 |
| hsa04657 | IL-17 signaling pathway | 20 | 6.968641115 | 7.13E-12 | 2.01E-09 | 6.49E-11 | 4.65E-11 |
| hsa05310 | Asthma | 13 | 4.529616725 | 1.20E-11 | 3.39E-09 | 1.06E-10 | 7.59E-11 |
| hsa04933 | AGE-RAGE signaling pathway in diabetic complications | 20 | 6.968641115 | 2.23E-11 | 6.29E-09 | 1.91E-10 | 1.36E-10 |
| hsa05416 | Viral myocarditis | 17 | 5.923344948 | 3.19E-11 | 8.99E-09 | 2.64E-10 | 1.89E-10 |
| hsa05150 | Staphylococcus aureus infection | 19 | 6.620209059 | 1.65E-10 | 4.65E-08 | 1.33E-09 | 9.51E-10 |
| hsa05146 | Amoebiasis | 19 | 6.620209059 | 2.74E-10 | 7.73E-08 | 2.15E-09 | 1.54E-09 |
| hsa05161 | Hepatitis B | 23 | 8.013937282 | 4.94E-10 | 1.39E-07 | 3.77E-09 | 2.70E-09 |
| hsa05166 | Human T-cell leukemia virus 1 infection | 26 | 9.059233449 | 1.69E-09 | 4.77E-07 | 1.26E-08 | 8.99E-09 |
| hsa05235 | PD-L1 expression and PD-1 checkpoint pathway in cancer | 17 | 5.923344948 | 2.14E-09 | 6.04E-07 | 1.55E-08 | 1.11E-08 |
| hsa05133 | Pertussis | 16 | 5.574912892 | 2.22E-09 | 6.25E-07 | 1.56E-08 | 1.12E-08 |

BP=biological process; CC=cellular component; MF=molecular function; KEGG=Kyoto Encyclopedia of Genes and Genomes.
